# Supplementary material for: Cerium oxide particles: coating with charged polysaccharides for limiting the aggregation state in biological media and potential application for antibiotic delivery
Source: Royal Society of Chemistry journal article supplement (doi:10.1039/d3pm00081h), 2024-01-01
Supplement: d3pm00081h1.pdf [file d3pm00081h1.pdf]

### Supplementary Information

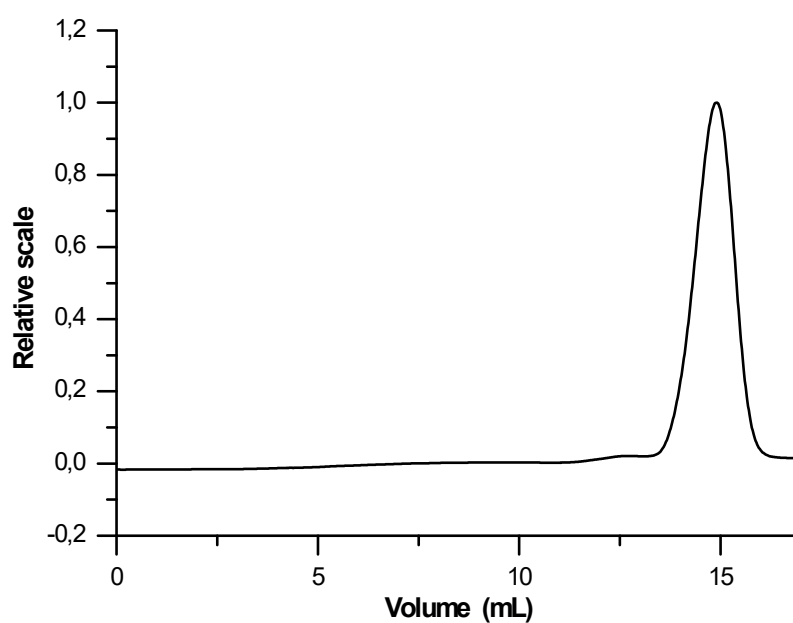

**Figure S1:** Elution profiles from the refractive index of dextran sulfate. *Average molar masses and molar masses distributions were determined by size exclusion chromatography (SEC) coupled online with differential refractive index (DRI) detectors (results obtained via PEG calibration). The DRI detector is a RI, Optilab-TREX, WYATT TECHNOLOGY. Columns (PLaquagel-OH 40+30) were eluted with 0.1 mol.L<sup>-1</sup> LiNO<sub>3</sub>, respectively at 1 mL min<sup>-1</sup>. Eluent was filtered through a 0.1 μm filter unit (Millipore, USA).*

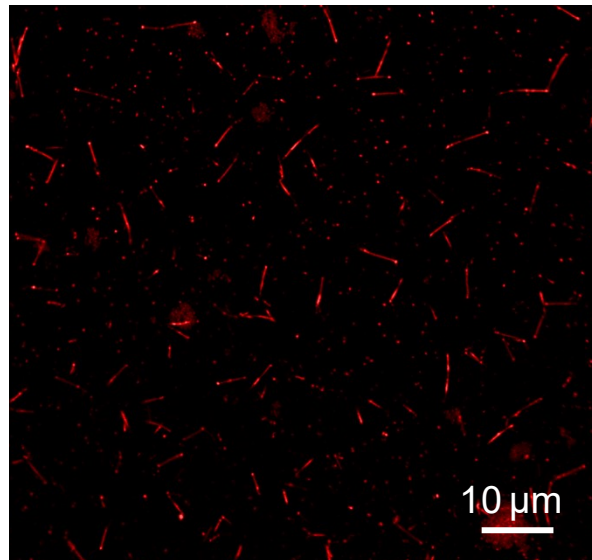

**Figure S2:** Acridine orange assay
